# Supplementary material for: A computational approach to distinguish somatic vs. germline origin of genomic alterations from deep sequencing of cancer specimens without a matched normal
Source: PubMed Central journal article supplement (PMC5832436; doi:10.1371/journal.pcbi.1005965), 2018-02-07
Supplement: pcbi.1005965.s003.pdf [file pcbi.1005965.s003.pdf]

**S1 Fig. Table of expected mutational allele frequencies.** Given copy number (C), variant allele count (V), sample purity (p), and variant status (somatic or germline), we can generate a table of expected allele frequencies. V is the number of copies in a tumor cell that carries the mutation, C is the tumor number of copies for all variants at the same physical position, and p is the fraction of cells in the sequenced sample that is tumor. In the germline setting, the expected allele frequencies are computed as  $AF_{germline} = \frac{pV+1-p}{pC+2(1-p)}$ . In the somatic setting, it is

$AF_{somatic} = \frac{pV}{pC+2(1-p)}$ . These expected allele frequencies are enumerated below, for a sample of p, V, and C.

| copy number  | LOH status   | status of variant | p: sample purity |    |    |    |    |    |    |    |    |    |    |    |    |    |    |    |    |    |    |    |     |
|--------------|--------------|-------------------|------------------|----|----|----|----|----|----|----|----|----|----|----|----|----|----|----|----|----|----|----|-----|
|              |              |                   | 0                | 5  | 10 | 15 | 20 | 25 | 30 | 35 | 40 | 45 | 50 | 55 | 60 | 65 | 70 | 75 | 80 | 85 | 90 | 95 | 100 |
| C=1          | LOH          | V=0 germline      | 50               | 49 | 47 | 46 | 44 | 43 | 41 | 39 | 38 | 35 | 33 | 31 | 29 | 26 | 23 | 20 | 17 | 13 | 9  | 5  | 0   |
|              |              | V=1 somatic       | 0                | 3  | 5  | 8  | 11 | 14 | 18 | 21 | 25 | 29 | 33 | 38 | 43 | 48 | 54 | 60 | 67 | 74 | 82 | 90 | 100 |
|              |              | V=1 germline      | 50               | 51 | 53 | 54 | 56 | 57 | 59 | 61 | 63 | 65 | 67 | 69 | 71 | 74 | 77 | 80 | 83 | 87 | 91 | 95 | 100 |
| C=2          | LOH          | V=0 germline      | 50               | 48 | 45 | 43 | 40 | 38 | 35 | 33 | 30 | 28 | 25 | 23 | 20 | 18 | 15 | 13 | 10 | 8  | 5  | 3  | 0   |
|              |              | V=2 somatic       | 0                | 5  | 10 | 15 | 20 | 25 | 30 | 35 | 40 | 45 | 50 | 55 | 60 | 65 | 70 | 75 | 80 | 85 | 90 | 95 | 100 |
|              |              | V=2 germline      | 50               | 53 | 55 | 58 | 60 | 63 | 65 | 68 | 70 | 73 | 75 | 78 | 80 | 83 | 85 | 88 | 90 | 93 | 95 | 98 | 100 |
|              | het          | V=1 somatic       | 0                | 3  | 5  | 8  | 10 | 13 | 15 | 18 | 20 | 23 | 25 | 28 | 30 | 33 | 35 | 38 | 40 | 43 | 45 | 48 | 50  |
|              |              | V=1 germline      | 50               | 50 | 50 | 50 | 50 | 50 | 50 | 50 | 50 | 50 | 50 | 50 | 50 | 50 | 50 | 50 | 50 | 50 | 50 | 50 | 50  |
| C=3          | LOH          | V=0 germline      | 50               | 46 | 43 | 40 | 36 | 33 | 30 | 28 | 25 | 22 | 20 | 18 | 15 | 13 | 11 | 9  | 7  | 5  | 3  | 2  | 0   |
|              |              | V=3 somatic       | 0                | 7  | 14 | 21 | 27 | 33 | 39 | 45 | 50 | 55 | 60 | 65 | 69 | 74 | 78 | 82 | 86 | 89 | 93 | 97 | 100 |
|              |              | V=3 germline      | 50               | 54 | 57 | 60 | 64 | 67 | 70 | 72 | 75 | 78 | 80 | 82 | 85 | 87 | 89 | 91 | 93 | 95 | 97 | 98 | 100 |
|              | het          | V=1 somatic       | 0                | 2  | 5  | 7  | 9  | 11 | 13 | 15 | 17 | 18 | 20 | 22 | 23 | 25 | 26 | 27 | 29 | 30 | 31 | 32 | 33  |
|              |              | V=1 germline      | 50               | 49 | 48 | 47 | 45 | 44 | 43 | 43 | 42 | 41 | 40 | 39 | 38 | 38 | 37 | 36 | 36 | 35 | 34 | 34 | 33  |
|              |              | V=2 somatic       | 0                | 5  | 10 | 14 | 18 | 22 | 26 | 30 | 33 | 37 | 40 | 43 | 46 | 49 | 52 | 55 | 57 | 60 | 62 | 64 | 67  |
|              | V=2 germline | 50                | 51               | 52 | 53 | 55 | 56 | 57 | 57 | 58 | 59 | 60 | 61 | 62 | 62 | 63 | 64 | 64 | 65 | 66 | 66 | 67 |     |
| C=4          | LOH          | V=0 germline      | 50               | 45 | 41 | 37 | 33 | 30 | 27 | 24 | 21 | 19 | 17 | 15 | 13 | 11 | 9  | 7  | 6  | 4  | 3  | 1  | 0   |
|              |              | V=4 somatic       | 0                | 10 | 18 | 26 | 33 | 40 | 46 | 52 | 57 | 62 | 67 | 71 | 75 | 79 | 82 | 86 | 89 | 92 | 95 | 97 | 100 |
|              |              | V=4 germline      | 50               | 55 | 59 | 63 | 67 | 70 | 73 | 76 | 79 | 81 | 83 | 85 | 88 | 89 | 91 | 93 | 94 | 96 | 97 | 99 | 100 |
|              | het          | V=1 somatic       | 0                | 2  | 5  | 7  | 8  | 10 | 12 | 13 | 14 | 16 | 17 | 18 | 19 | 20 | 21 | 21 | 22 | 23 | 24 | 24 | 25  |
|              |              | V=1 germline      | 50               | 48 | 45 | 43 | 42 | 40 | 38 | 37 | 36 | 34 | 33 | 32 | 31 | 30 | 29 | 29 | 28 | 27 | 26 | 26 | 25  |
|              |              | V=3 somatic       | 0                | 7  | 14 | 20 | 25 | 30 | 35 | 39 | 43 | 47 | 50 | 53 | 56 | 59 | 62 | 64 | 67 | 69 | 71 | 73 | 75  |
|              |              | V=3 germline      | 50               | 52 | 55 | 57 | 58 | 60 | 62 | 63 | 64 | 66 | 67 | 68 | 69 | 70 | 71 | 71 | 72 | 73 | 74 | 74 | 75  |
|              | het          | V=2 somatic       | 0                | 5  | 9  | 13 | 17 | 20 | 23 | 26 | 29 | 31 | 33 | 35 | 38 | 39 | 41 | 43 | 44 | 46 | 47 | 49 | 50  |
| V=2 germline |              | 50                | 50               | 50 | 50 | 50 | 50 | 50 | 50 | 50 | 50 | 50 | 50 | 50 | 50 | 50 | 50 | 50 | 50 | 50 | 50 | 50 |     |
| C=5          | LOH          | V=0 germline      | 50               | 44 | 39 | 35 | 31 | 27 | 24 | 21 | 19 | 16 | 14 | 12 | 11 | 9  | 7  | 6  | 5  | 3  | 2  | 1  | 0   |
|              |              | V=5 somatic       | 0                | 12 | 22 | 31 | 38 | 45 | 52 | 57 | 63 | 67 | 71 | 75 | 79 | 82 | 85 | 88 | 91 | 93 | 96 | 98 | 100 |

|     |              |    |    |    |    |    |    |    |    |    |    |    |    |    |    |    |    |    |    |    |    |     |
|-----|--------------|----|----|----|----|----|----|----|----|----|----|----|----|----|----|----|----|----|----|----|----|-----|
|     | V=5 germline | 50 | 56 | 61 | 65 | 69 | 73 | 76 | 79 | 81 | 84 | 86 | 88 | 89 | 91 | 93 | 94 | 95 | 97 | 98 | 99 | 100 |
| het | V=1 somatic  | 0  | 2  | 4  | 6  | 8  | 9  | 10 | 11 | 13 | 13 | 14 | 15 | 16 | 16 | 17 | 18 | 18 | 19 | 19 | 20 | 20  |
|     | V=1 germline | 50 | 47 | 43 | 41 | 38 | 36 | 34 | 33 | 31 | 30 | 29 | 27 | 26 | 25 | 24 | 24 | 23 | 22 | 21 | 21 | 20  |
|     | V=4 somatic  | 0  | 9  | 17 | 24 | 31 | 36 | 41 | 46 | 50 | 54 | 57 | 60 | 63 | 66 | 68 | 71 | 73 | 75 | 77 | 78 | 80  |
|     | V=4 germline | 50 | 53 | 57 | 59 | 62 | 64 | 66 | 67 | 69 | 70 | 71 | 73 | 74 | 75 | 76 | 76 | 77 | 78 | 79 | 79 | 80  |
| het | V=2 somatic  | 0  | 5  | 9  | 12 | 15 | 18 | 21 | 23 | 25 | 27 | 29 | 30 | 32 | 33 | 34 | 35 | 36 | 37 | 38 | 39 | 40  |
|     | V=2 germline | 50 | 49 | 48 | 47 | 46 | 45 | 45 | 44 | 44 | 43 | 43 | 42 | 42 | 42 | 41 | 41 | 41 | 41 | 40 | 40 | 40  |
|     | V=3 somatic  | 0  | 7  | 13 | 18 | 23 | 27 | 31 | 34 | 38 | 40 | 43 | 45 | 47 | 49 | 51 | 53 | 55 | 56 | 57 | 59 | 60  |
|     | V=3 germline | 50 | 51 | 52 | 53 | 54 | 55 | 55 | 56 | 56 | 57 | 57 | 58 | 58 | 58 | 59 | 59 | 59 | 59 | 60 | 60 | 60  |
