# Supplementary material for: A computational approach to distinguish somatic vs. germline origin of genomic alterations from deep sequencing of cancer specimens without a matched normal
Source: PubMed Central journal article supplement (PMC5832436; doi:10.1371/journal.pcbi.1005965), 2018-02-07
Supplement: pcbi.1005965.s006.pdf [file pcbi.1005965.s006.pdf]

**S1 Table. Somatic hotspot mutations and germline polymorphisms used for SGZ validation**

**A. Somatic hotspot mutations in Fig 3A**

| Gene          | Mutation | Germline calls | Somatic calls |
|---------------|----------|----------------|---------------|
| <i>AKT1</i>   | E17K     | 8              | 106           |
| <i>BRAF</i>   | V600†    | 12             | 398           |
| <i>BRAF</i>   | D594†    | 0              | 56            |
| <i>EGFR</i>   | S768I    | 0              | 16            |
| <i>EGFR</i>   | L858R    | 5              | 143           |
| <i>ERBB2</i>  | S310F    | 3              | 66            |
| <i>IDH1</i>   | R132H    | 13             | 144           |
| <i>KRAS</i>   | G13†     | 12             | 281           |
| <i>KRAS</i>   | G12†     | 82             | 2196          |
| <i>KRAS</i>   | Q61†     | 6              | 218           |
| <i>MAP2K1</i> | K57†     | 0              | 22            |
| <i>NRAS</i>   | G13†     | 2              | 35            |
| <i>NRAS</i>   | G12†     | 7              | 79            |
| <i>NRAS</i>   | Q61†     | 20             | 279           |
| <i>PIK3CA</i> | E542†    | 12             | 286           |
| <i>PIK3CA</i> | H1047†   | 20             | 507           |
| <i>PIK3CA</i> | E545†    | 13             | 493           |

† Includes all missense mutations of the codon

**B. Germline polymorphisms in Fig 3A**

| Gene          | Mutation | Germline calls | Somatic calls |
|---------------|----------|----------------|---------------|
| <i>GATA2</i>  | P161A    | 350            | 7             |
| <i>MAP3K1</i> | S939C    | 638            | 55            |
| <i>NTRK1</i>  | G18E     | 365            | 3             |
| <i>BRCA2</i>  | K3326*   | 288            | 5             |
| <i>FANCF</i>  | A186V    | 275            | 2             |
| <i>PNRC1</i>  | A152V    | 268            | 5             |
| <i>GPR124</i> | V1146A   | 244            | 10            |
| <i>TSC1</i>   | K587R    | 217            | 2             |
| <i>ZNF217</i> | M410V    | 218            | 5             |
| <i>CREBBP</i> | N1978S   | 183            | 3             |
| <i>BRIP1</i>  | V193I    | 179            | 2             |
| <i>CTCF</i>   | P315S    | 140            | 0             |
| <i>APC</i>    | I1307K   | 140            | 2             |
| <i>NOTCH2</i> | R91L     | 141            | 6             |
| <i>RPTOR</i>  | A862T    | 128            | 3             |
| <i>ESR1</i>   | H6Y      | 125            | 3             |

|                |        |    |   |
|----------------|--------|----|---|
| <i>TSHR</i>    | V721F  | 92 | 1 |
| <i>FAT3</i>    | A3418S | 77 | 1 |
| <i>RAD52</i>   | S346*  | 59 | 1 |
| <i>PIK3C2G</i> | *1446S | 45 | 1 |
