# Supplementary material for: A computational approach to distinguish somatic vs. germline origin of genomic alterations from deep sequencing of cancer specimens without a matched normal
Source: PubMed Central journal article supplement (PMC5832436; doi:10.1371/journal.pcbi.1005965), 2018-02-07
Supplement: pcbi.1005965.s007.pdf [file pcbi.1005965.s007.pdf]

**S2 Table. List of variants in COSMIC predicted to be germline.**

| Gene    | Protein change | CDS change       | hg19 coordinate | dbSNP ID                  | Common SNP in 1000 Genomes | P-value   |
|---------|----------------|------------------|-----------------|---------------------------|----------------------------|-----------|
| EP300   | P925T          | 2773C>A          | chr22:41546158  | rs148884710               | no                         | 7.97E-235 |
| VHL     | P25L           | 74C>T            | chr3:10183605   | rs35460768                | no                         | 2.99E-191 |
| CSF1R   | V32G           | 95T>G            | chr5:149460542  | rs56048668                | no                         | 3.40E-181 |
| APC     | I1307K         | 3920T>A          | chr5:112175211  | rs1801155                 | no                         | 1.54E-159 |
| RET     | Y791F          | 2372A>T          | chr10:43613908  | rs77724903                | no                         | 6.41E-124 |
| MSH6    | V509A          | 1526T>C          | chr2:48026648   | rs63751005                | no                         | 2.96E-84  |
| MLL     | L3614P         | 10841T>C         | chr11:118379865 | rs146191865               | yes                        | 7.61E-71  |
| IL7R    | T244I          | 731C>T           | chr5:35874575   | rs6897932                 | yes                        | 2.28E-60  |
| CREBBP  | S893L          | 2678C>T          | chr16:3820773   | rs142047649               | no                         | 5.71E-47  |
| ATM     | S978P          | 2932T>C          | chr11:108141988 | rs139552233               | no                         | 2.01E-45  |
| CREBBP  | P858S          | 2572C>T          | chr16:3820879   | rs145733598               | yes                        | 7.78E-40  |
| IGF1R   | R595H          | 1784G>A          | chr15:99456467  | rs45483397;<br>rs56248469 | no                         | 1.26E-36  |
| PAX5    | S213L          | 638C>T           | chr9:36966688   | rs137870876               | no                         | 2.40E-36  |
| MSH2    | G322D          | 965G>A           | chr2:47643457   | rs4987188                 | yes                        | 1.20E-35  |
| PARP3   | S91N           | 272G>A           | chr3:51978193   | rs34224216                | yes                        | 1.14E-34  |
| TBX3    | S615A          | 1843T>G          | chr12:115110035 | .                         | no                         | 4.10E-34  |
| GRIN2A  | A1276G         | 3827C>G          | chr16:9857574   | rs145063086               | no                         | 5.72E-34  |
| RET     | R114H          | 341G>A           | chr10:43597793  | rs76397662                | yes                        | 5.16E-32  |
| CARD11  | N191S          | 572A>G           | chr7:2983958    | rs147264763               | no                         | 9.78E-32  |
| MLL2    | P1131L         | 3392C>T          | chr12:49443979  | rs201623566               | no                         | 1.85E-31  |
| BRCA2   | S1982fs*22     | 5946_5946delT    | chr13:32914437  | rs80359550                | no                         | 4.90E-31  |
| APC     | R1171C         | 3511C>T          | chr5:112174802  | rs201830995               | no                         | 3.79E-26  |
| FLT4    | S637R          | 1911C>G          | chr5:180048651  | rs148898412               | no                         | 3.61E-25  |
| EGFR    | P848L          | 2543C>T          | chr7:55259485   | rs148934350               | no                         | 3.42E-24  |
| MLL2    | R1388L         | 4163G>T          | chr12:49441821  | rs202217665               | no                         | 3.25E-23  |
| RB1     | G310E          | 929G>A           | chr13:48939097  | rs200844292               | no                         | 2.94E-21  |
| ALK     | E1419K         | 4255G>A          | chr2:29416698   | rs56181542                | no                         | 5.56E-21  |
| EGFR    | E282K          | 844G>A           | chr7:55221800   | rs199796955               | no                         | 2.00E-20  |
| VHL     | P81S           | 241C>T           | chr3:10183772   | rs104893829               | no                         | 2.52E-18  |
| CDKN2A  | I49T           | 146T>C           | chr9:21974681   | rs199907548               | no                         | 2.39E-17  |
| FBXW7   | E192A          | 575A>C           | chr4:153271203  | rs201015633               | no                         | 4.53E-17  |
| KDR     | N793S          | 2378A>G          | chr4:55964435   | rs200147160               | yes                        | 2.16E-15  |
| STK11   | F298L          | 894C>A           | chr19:1221979   | rs199681533               | no                         | 2.16E-15  |
| LRP1B   | R1072H         | 3215G>A          | chr2:141680638  | rs370586151               | no                         | 1.47E-14  |
| AURKB   | R147W          | 439C>T           | chr17:8110166   | rs148133660               | no                         | 2.05E-14  |
| MLH1    | R217C          | 649C>T           | chr3:37053562   | rs4986984                 | no                         | 3.69E-13  |
| PIK3C2G | I294T          | 881T>C           | chr12:18443908  | .                         | no                         | 6.99E-13  |
| BRCA2   | T1354M         | 4061C>T          | chr13:32912553  | rs80358656                | no                         | 1.85E-12  |
| FANCA   | M160I          | 480G>A           | chr16:89877157  | rs200603300               | no                         | 1.85E-12  |
| SETD2   | I2295M         | 6885A>G          | chr3:47098389   | rs150476239               | no                         | 1.85E-12  |
| TP53    | R290H          | 869G>A           | chr17:7577069   | rs55819519                | no                         | 6.64E-12  |
| MLL2    | L2610P         | 7829T>C          | chr12:49433724  | rs200998047               | no                         | 1.76E-11  |
| VHL     | R200W          | 598C>T           | chr3:10191605   | rs28940298                | no                         | 3.33E-11  |
| AXL     | V289M          | 865G>A           | chr19:41743930  | rs141302305               | no                         | 6.31E-11  |
| PTEN    | A79T           | 235G>A           | chr10:89690828  | rs202004587               | no                         | 1.20E-10  |
| BRCA1   | C61G           | 181T>G           | chr17:41258504  | rs28897672                | no                         | 1.67E-10  |
| FANCM   | R658*          | 1972C>T          | chr14:45636336  | rs368728266               | no                         | 1.67E-10  |
| TP53    | N235S          | 704A>G           | chr17:7577577   | rs144340710               | no                         | 3.16E-10  |
| BRCA2   | A938fs*21      | 2808_2811delACAA | chr13:32911299  | rs80359352                | no                         | 3.16E-10  |
| PARP1   | A625T          | 1873G>A          | chr1:226564877  | .                         | no                         | 3.16E-10  |
| FAT3    | T3929M         | 11786C>T         | chr11:92600034  | .                         | no                         | 1.59E-09  |
| AXL     | V744M          | 2230G>A          | chr19:41763458  | rs372169583               | no                         | 1.59E-09  |
| FANCM   | S1276L         | 3827C>T          | chr14:45645784  | .                         | no                         | 1.51E-08  |

|               |         |            |                 |             |     |          |
|---------------|---------|------------|-----------------|-------------|-----|----------|
| <i>CREBBP</i> | A467T   | 1399G>A    | chr16:3832859   | rs202225861 | no  | 1.51E-08 |
| <i>MLH1</i>   | R325Q   | 974G>A     | chr3:37061890   | rs63750268  | no  | 1.51E-08 |
| <i>CDKN2A</i> | A121T   | 361G>A     | chr9:21971040   | rs199888003 | no  | 1.51E-08 |
| <i>PTCH1</i>  | T416S   | 1247C>G    | chr9:98240437   | rs201174718 | no  | 2.86E-08 |
| <i>EPHB1</i>  | V322I   | 964G>A     | chr3:134851558  | .           | no  | 3.87E-08 |
| <i>NRAS</i>   | P185S   | 553C>T     | chr1:115251173  | rs374061873 | no  | 1.43E-07 |
| <i>ASXL1</i>  | V1367I  | 4099G>A    | chr20:31024614  | rs147456014 | no  | 1.43E-07 |
| <i>RET</i>    | V804M   | 2410G>A    | chr10:43614996  | rs79658334  | no  | 1.43E-07 |
| <i>FGFR1</i>  | T141R   | 422C>G     | chr8:38285890   | rs200482627 | no  | 1.43E-07 |
| <i>PMS2</i>   | V415M   | 1243G>A    | chr7:6027153    | rs138387687 | no  | 2.71E-07 |
| <i>ATR</i>    | R1082H  | 3245G>A    | chr3:142266679  | rs146504354 | no  | 2.71E-07 |
| <i>KDM2B</i>  | T28fs*8 | 82_83delAC | chr12:122018733 | .           | no  | 9.74E-07 |
| <i>MLL</i>    | K2658N  | 7974G>C    | chr11:118374590 | rs142807735 | no  | 1.36E-06 |
| <i>RET</i>    | E511K   | 1531G>A    | chr10:43607555  | rs201553718 | yes | 2.58E-06 |
| <i>CDKN2A</i> | A57V    | 170C>T     | chr9:21971188   | rs372266620 | no  | 2.58E-06 |
| <i>CDH1</i>   | S838G   | 2512A>G    | chr16:68867265  | rs121964872 | no  | 2.58E-06 |
