# Supplementary material for: A computational approach to distinguish somatic vs. germline origin of genomic alterations from deep sequencing of cancer specimens without a matched normal
Source: PubMed Central journal article supplement (PMC5832436; doi:10.1371/journal.pcbi.1005965), 2018-02-07
Supplement: pcbi.1005965.s008.pdf [file pcbi.1005965.s008.pdf]

**S3 Table. Summary of 84 samples from 30 non-small cell lung & colon cancer patients.**

| Patient ID | site of primary tumor | Sample type | gender | median coverage | computational purity assessment (%) |
|------------|-----------------------|-------------|--------|-----------------|-------------------------------------|
| 1          | Lung                  | normal      | M      | 830             | NA                                  |
| 1          | Lung                  | primary     | M      | 909             | 53                                  |
| 1          | Lung                  | metastatic  | M      | 891             | 50                                  |
| 2          | Lung                  | normal      | F      | 943             | NA                                  |
| 2          | Lung                  | primary     | F      | 852             | 30                                  |
| 2          | Lung                  | metastatic  | F      | 832             | 20                                  |
| 3          | Lung                  | normal      | M      | 832             | NA                                  |
| 3          | Lung                  | primary     | M      | 845             | 32                                  |
| 3          | Lung                  | metastatic  | M      | 729             | 47                                  |
| 4          | Lung                  | normal      | M      | 827             | NA                                  |
| 4          | Lung                  | primary     | M      | 583             | 40                                  |
| 4          | Lung                  | metastatic  | M      | 782             | 24                                  |
| 5          | Lung                  | normal      | M      | 913             | NA                                  |
| 5          | Lung                  | primary     | M      | 893             | 30                                  |
| 5          | Lung                  | metastatic  | M      | 932             | 30                                  |
| 6          | Lung                  | normal      | M      | 845             | NA                                  |
| 6          | Lung                  | primary     | M      | 668             | 40                                  |
| 6          | Lung                  | metastatic  | M      | 819             | 50                                  |
| 7          | Lung                  | normal      | M      | 811             | NA                                  |
| 7          | Lung                  | primary     | M      | 798             | 50                                  |
| 7          | Lung                  | metastatic  | M      | 851             | 44                                  |
| 8          | Lung                  | normal      | M      | 555             | NA                                  |
| 8          | Lung                  | primary     | M      | 731             | 65                                  |
| 8          | Lung                  | metastatic  | M      | 814             | 20                                  |
| 9          | Lung                  | normal      | M      | 875             | NA                                  |
| 9          | Lung                  | primary     | M      | 758             | 42                                  |
| 9          | Lung                  | metastatic  | M      | 643             | 45                                  |
| 10         | Lung                  | normal      | M      | 723             | NA                                  |
| 10         | Lung                  | primary     | M      | 690             | 66                                  |
| 10         | Lung                  | metastatic  | M      | 390             | 70                                  |
| 11         | Lung                  | normal      | M      | 774             | NA                                  |
| 11         | Lung                  | primary     | M      | 584             | 30                                  |
| 11         | Lung                  | metastatic  | M      | 299             | 40                                  |
| 12         | Lung                  | normal      | M      | 756             | NA                                  |
| 12         | Lung                  | primary     | M      | 795             | 40                                  |
| 12         | Lung                  | metastatic  | M      | 926             | 60                                  |
| 13         | Colon                 | normal      | F      | 1001            | NA                                  |
| 13         | Colon                 | primary     | F      | 1097            | 30                                  |
| 13         | Colon                 | metastatic  | F      | 1095            | 50                                  |
| 14         | Colon                 | normal      | M      | 980             | NA                                  |
| 14         | Colon                 | metastatic  | M      | 998             | 67                                  |
| 15         | Colon                 | normal      | M      | 595             | NA                                  |
| 15         | Colon                 | metastatic  | M      | 890             | 20                                  |
| 16         | Colon                 | primary     | F      | 587             | 20                                  |
| 16         | Colon                 | normal      | F      | 991             | NA                                  |
| 16         | Colon                 | metastatic  | F      | 1025            | 49                                  |
| 17         | Colon                 | primary     | M      | 1017            | 80                                  |
| 17         | Colon                 | normal      | M      | 797             | NA                                  |
| 17         | Colon                 | metastatic  | M      | 803             | 68                                  |
| 18         | Colon                 | normal      | M      | 786             | NA                                  |
| 18         | Colon                 | primary     | M      | 719             | 40                                  |
| 18         | Colon                 | metastatic  | M      | 913             | 69                                  |

|    |         |            |   |      |    |
|----|---------|------------|---|------|----|
| 19 | Colon   | normal     | M | 737  | NA |
| 19 | Colon   | primary    | M | 992  | 20 |
| 19 | Colon   | metastatic | M | 864  | 30 |
| 20 | Colon   | normal     | M | 984  | NA |
| 21 | Colon   | normal     | F | 742  | NA |
| 21 | Colon   | primary    | F | 878  | 50 |
| 22 | Colon   | normal     | M | 1107 | NA |
| 22 | Colon   | primary    | M | 963  | 34 |
| 22 | Colon   | metastatic | M | 882  | 40 |
| 23 | Colon   | normal     | M | 812  | NA |
| 23 | Colon   | primary    | M | 1087 | 70 |
| 23 | Colon   | metastatic | M | 802  | 90 |
| 24 | Colon   | normal     | M | 795  | NA |
| 24 | Colon   | primary    | M | 601  | 22 |
| 24 | Colon   | metastatic | M | 702  | 58 |
| 25 | Colon   | normal     | M | 837  | NA |
| 25 | Colon   | primary    | M | 855  | 70 |
| 25 | Colon   | metastatic | M | 1112 | 56 |
| 26 | Colon   | normal     | M | 891  | NA |
| 26 | Colon   | primary    | M | 980  | 56 |
| 26 | Colon   | metastatic | M | 764  | 20 |
| 27 | Rectum  | normal     | M | 917  | NA |
| 27 | Rectum  | primary    | M | 844  | 50 |
| 27 | Rectum  | metastatic | M | 812  | 30 |
| 28 | Gastric | normal     | M | 786  | NA |
| 28 | Gastric | primary    | M | 793  | 50 |
| 28 | Gastric | metastatic | M | 661  | 70 |
| 29 | Gastric | normal     | M | 802  | NA |
| 29 | Gastric | primary    | M | 963  | 50 |
| 30 | Gastric | normal     | M | 920  | NA |
| 30 | Gastric | primary    | M | 838  | 40 |
| 30 | Gastric | metastatic | M | 777  | 40 |
