# Supplementary material for: A computational approach to distinguish somatic vs. germline origin of genomic alterations from deep sequencing of cancer specimens without a matched normal
Source: PubMed Central journal article supplement (PMC5832436; doi:10.1371/journal.pcbi.1005965), 2018-02-07
Supplement: pcbi.1005965.s009.pdf [file pcbi.1005965.s009.pdf]

**S4 Table. Mutations from cell line dataset that were detected by our pipeline and used for SGZ validation.**

| Cell line ID | Mutation                                                                         | Genomic Position | Reference mutation status <sup>†††</sup> |
|--------------|----------------------------------------------------------------------------------|------------------|------------------------------------------|
| HCC-1937     | RUNX1:NM_001754:c.1106C>T_p.S369L                                                | chr21:36164769   | Germline                                 |
| HCC-1937     | DIS3:NM_001128226:c.80A>G_p.D27G                                                 | chr13:73355891   | Germline                                 |
| HCC-1937     | BARD1:NM_000465:c.1071_1091delACCATTGCCTGAATGTTCTTC_p.P358_S364del <sup>††</sup> | chr2:215645506   | Germline                                 |
| HCC-1937     | MLL2:NM_003482:c.1952C>T_p.S651L                                                 | chr12:49445514   | Germline                                 |
| HCC-1937     | ARID2:NM_152641:c.3217C>T_p.P1073S                                               | chr12:46245123   | Germline                                 |
| HCC-1937     | GSK3B:NM_002093:c.930T>A_p.H310Q                                                 | chr3:119585455   | Germline                                 |
| HCC-1937     | BRCA1:NM_007294:c.5263_5264insC_p.Q1756fs*74                                     | chr17:41209082   | Germline                                 |
| HCC-1937     | RB1:NM_000321:c.2222_2325del178_p.R741fs*19 <sup>†</sup>                         | chr13:49039143   | Somatic                                  |
| HCC-1937     | ARFRP1:NM_003224:c.322C>G_p.L108V                                                | chr20:62333512   | Somatic                                  |
| HCC-1937     | NTRK2:NM_006180:c.1591C>G_p.Q531E                                                | chr9:87482304    | Somatic                                  |
| HCC-1937     | TP53:NM_000546:c.916C>T_p.R306*                                                  | chr17:7577022    | Somatic                                  |
| HCC-1937     | LRP1B:NM_018557:c.1790-1G>C                                                      | chr2:141777672   | Somatic                                  |
| HCC-1937     | LRP1B:NM_018557:c.8593T>A_p.C2865S                                               | chr2:141260601   | Somatic                                  |
| HCC-1937     | NF1:NM_001042492:c.2099C>G_p.T700S                                               | chr17:29553550   | Somatic                                  |
| HCC-1954     | TET2:NM_001127208:c.1381C>T_p.Q461*                                              | chr4:106156480   | Germline                                 |
| HCC-1954     | FANCA:NM_000135:c.4036G>A_p.A1346T                                               | chr16:89805672   | Germline                                 |
| HCC-1954     | TSC2:NM_000548:c.2348C>G_p.T783S                                                 | chr16:2122977    | Germline                                 |
| HCC-1954     | BARD1:NM_000465:c.1071_1091delACCATTGCCTGAATGTTCTTC_p.P358_S364del <sup>††</sup> | chr2:215645506   | Germline                                 |
| HCC-1954     | EPHA3:NM_005233:c.872C>A_p.P291Q                                                 | chr3:89390123    | Germline                                 |
| HCC-1954     | NBN:NM_002485:c.758C>T_p.T253I                                                   | chr8:90982730    | Germline                                 |
| HCC-1954     | MLL2:NM_003482:c.11083C>T_p.P3695S                                               | chr12:49427405   | Germline                                 |
| HCC-1954     | EPHB1:NM_004441:c.2942C>T_p.T981M                                                | chr3:134977949   | Germline                                 |
| HCC-1954     | DIS3:NM_001128226:c.1457G>T_p.G486V                                              | chr13:73345991   | Germline                                 |
| HCC-1954     | SETD2:NM_014159:c.6686T>G_p.V2229G                                               | chr3:47098588    | Germline                                 |
| HCC-1954     | NOTCH1:NM_017617:c.3644G>A_p.G1215D                                              | chr9:139401425   | Somatic                                  |
| HCC-1954     | PIK3CA:NM_006218:c.3140A>G_p.H1047R                                              | chr3:178952085   | Somatic                                  |
| HCC-1954     | TP53:NM_000546:c.488A>G_p.Y163C                                                  | chr17:7578442    | Somatic                                  |
| HCC-1954     | PARP4:NM_006437:c.3509C>T_p.T1170I                                               | chr13:25016762   | Somatic                                  |
| HCC-1954     | BRCA1:NM_007294:c.5425_5426delGT_p.V1809fs*20                                    | chr17:41199700   | Somatic                                  |
| HCC-1954     | APC:NM_000038:c.6998G>A_p.R2333K                                                 | chr5:112178289   | Somatic                                  |
| NCI-H1395    | PBRM1:NM_018313:c.4535C>T_p.A1512V                                               | chr3:52584478    | Germline                                 |
| NCI-H1395    | GNAS:NM_001077490:c.1268C>A_p.P423H                                              | chr20:57429775   | Germline                                 |
| NCI-H1395    | FANCA:NM_000135:c.2T>C_p.M1T                                                     | chr16:89883022   | Germline                                 |
| NCI-H1395    | PTCH1:NM_000264:c.3538C>G_p.P1180A                                               | chr9:98212134    | Germline                                 |
| NCI-H1395    | FANCG:NM_004629:c.181C>T_p.P61S                                                  | chr9:35078728    | Germline                                 |
| NCI-H1395    | CREBBP:NM_004380:c.5933A>G_p.N1978S                                              | chr16:3779115    | Germline                                 |
| NCI-H1395    | STK11:NM_000455:c.169_169delG_p.E57fs*7                                          | chr19:1207080    | Somatic                                  |
| NCI-H1395    | ATM:NM_000051:c.7996A>G_p.T2666A                                                 | chr11:108204681  | Somatic                                  |

|           |                                                          |                |         |
|-----------|----------------------------------------------------------|----------------|---------|
| NCI-H1395 | FLT4:NM_002020:c.194A>T_p.Q65L                           | chr5:180057761 | Somatic |
| NCI-H1395 | DOT1L:NM_032482:c.3155G>T_p.G1052V                       | chr19:2222323  | Somatic |
| NCI-H1395 | BRAF:NM_004333:c.1406G>C_p.G469A                         | chr7:140481402 | Somatic |
| NCI-H1395 | DNMT3A:NM_022552:c.1226G>A_p.W409*                       | chr2:25469542  | Somatic |
| NCI-H1395 | CDKN2A:NM_000077:c.1_8delGGCGGGGAGCAGCATGGAGCC_p.M1fs*11 | chr9:21974818  | Somatic |

† Full annotation to short variant RB1:NM\_000321:c.2222\_2325del178\_p.R741fs\*19:frameshift:  
RB1:NM\_000321:c.2222\_2325delGTGTTTTGATCAAAGAAGAGGAGTATGATTCTATTAT  
AGTATTCTATAACTCGGTCTTCATGCAGAGACTGAAAACAAATATTTTGCAGTATGC  
TTCCACCAGGGTAGGTCAAAGTATCCTTTGATTGGAAAATCTAATGTAATGGGTC  
CACCAAACATTAATAAATAATCTAC\_p.R741fs\*19:frameshift.

†† Mutation

BARD1:NM\_000465:c.1071\_1091delACCATTCCTGAATGTTCTTC\_p.P358\_S364del:nonfr  
ameshift in cell line HCC-1937 and HCC-1954 is in a highly repetitive region and allele  
frequency estimation of this short variant is always poor in our pipeline. In this dataset with  
relatively small number of short variants, we excluded this short variant in analysis to avoid  
severe degradation in performance evaluation.

††† Reference mutation status was obtained by sequencing and comparing the 100% tumor  
content cell line with its matched normal.
