# Supplementary material for: A computational approach to distinguish somatic vs. germline origin of genomic alterations from deep sequencing of cancer specimens without a matched normal
Source: PubMed Central journal article supplement (PMC5832436; doi:10.1371/journal.pcbi.1005965), 2018-02-07
Supplement: pcbi.1005965.s010.pdf [file pcbi.1005965.s010.pdf]

**S5 Table. Mutations incorrectly classified by the basic method and correctly classified by SGZ in regions of copy number change in the cell line dataset.** As shown in the table, out of a total number of 184 mutations that are correctly classified by SGZ in the dataset, 63 of them are incorrectly classified by the basic method due to local copy number deviation from 2 and/or zygosity deviation from balanced heterozygosity (defined as M divided by C equal to 0.5).

| Sample ID/<br>Tumor purity | Cell line ID | Mutation                                     | AF   | depth | C | M | gold<br>standard | SGZ<br>prediction | Basic<br>method<br>prediction |
|----------------------------|--------------|----------------------------------------------|------|-------|---|---|------------------|-------------------|-------------------------------|
| 1/10%                      | HCC-1937     | RUNX1:NM_001754:c.1106C>T_p.S369L            | 0.56 | 854   | 2 | 0 | germline         | germline          | somatic                       |
| 1/10%                      | HCC-1937     | DIS3:NM_001128226:c.80A>G_p.D27G             | 0.61 | 468   | 2 | 0 | germline         | germline          | somatic                       |
| 1/10%                      | HCC-1937     | MLL2:NM_003482:c.1952C>T_p.S651L             | 0.59 | 1049  | 1 | 0 | germline         | germline          | somatic                       |
| 1/10%                      | HCC-1937     | ARID2:NM_152641:c.3217C>T_p.P1073S           | 0.54 | 1269  | 1 | 0 | germline         | germline          | somatic                       |
| 1/10%                      | HCC-1937     | GSK3B:NM_002093:c.930T>A_p.H310Q             | 0.58 | 856   | 2 | 0 | germline         | germline          | somatic                       |
| 1/10%                      | HCC-1937     | BRCA1:NM_007294:c.5263_5264insC_p.Q1756fs*74 | 0.57 | 824   | 2 | 0 | germline         | germline          | somatic                       |
| 2/10%                      | NCI-H1395    | PBRM1:NM_018313:c.4535C>T_p.A1512V           | 0.39 | 542   | 3 | 1 | germline         | germline          | somatic                       |
| 2/10%                      | NCI-H1395    | FANCA:NM_000135:c.2T>C_p.M1T                 | 0.43 | 228   | 3 | 1 | germline         | germline          | somatic                       |
| 2/10%                      | NCI-H1395    | CREBBP:NM_004380:c.5933A>G_p.N1978S          | 0.44 | 526   | 3 | 1 | germline         | germline          | somatic                       |
| 3/20%                      | HCC-1937     | RUNX1:NM_001754:c.1106C>T_p.S369L            | 0.62 | 525   | 3 | 0 | germline         | germline          | somatic                       |
| 3/20%                      | HCC-1937     | DIS3:NM_001128226:c.80A>G_p.D27G             | 0.75 | 324   | 6 | 0 | germline         | germline          | somatic                       |
| 3/20%                      | HCC-1937     | MLL2:NM_003482:c.1952C>T_p.S651L             | 0.66 | 749   | 3 | 0 | germline         | germline          | somatic                       |
| 3/20%                      | HCC-1937     | ARID2:NM_152641:c.3217C>T_p.P1073S           | 0.61 | 757   | 4 | 1 | germline         | germline          | somatic                       |
| 3/20%                      | HCC-1937     | GSK3B:NM_002093:c.930T>A_p.H310Q             | 0.7  | 540   | 4 | 0 | germline         | germline          | somatic                       |
| 4/20%                      | HCC-1954     | TET2:NM_001127208:c.1381C>T_p.Q461*          | 0.43 | 687   | 5 | 2 | germline         | germline          | somatic                       |
| 4/20%                      | HCC-1954     | EPHA3:NM_005233:c.872C>A_p.P291Q             | 0.42 | 551   | 4 | 2 | germline         | germline          | somatic                       |
| 4/20%                      | HCC-1954     | SETD2:NM_014159:c.6686T>G_p.V2229G           | 0.46 | 969   | 4 | 2 | germline         | germline          | somatic                       |
| 5/20%                      | NCI-H1395    | PBRM1:NM_018313:c.4535C>T_p.A1512V           | 0.34 | 587   | 2 | 0 | germline         | germline          | somatic                       |
| 5/20%                      | NCI-H1395    | FANCA:NM_000135:c.2T>C_p.M1T                 | 0.39 | 271   | 3 | 1 | germline         | germline          | somatic                       |
| 5/20%                      | NCI-H1395    | CREBBP:NM_004380:c.5933A>G_p.N1978S          | 0.42 | 651   | 4 | 1 | germline         | germline          | somatic                       |
| 6/30%                      | HCC-1937     | RUNX1:NM_001754:c.1106C>T_p.S369L            | 0.7  | 751   | 3 | 0 | germline         | germline          | somatic                       |
| 6/30%                      | HCC-1937     | DIS3:NM_001128226:c.80A>G_p.D27G             | 0.8  | 443   | 7 | 0 | germline         | germline          | somatic                       |
| 6/30%                      | HCC-1937     | MLL2:NM_003482:c.1952C>T_p.S651L             | 0.7  | 895   | 3 | 0 | germline         | germline          | somatic                       |
| 6/30%                      | HCC-1937     | ARID2:NM_152641:c.3217C>T_p.P1073S           | 0.61 | 1073  | 4 | 1 | germline         | germline          | somatic                       |
| 6/30%                      | HCC-1937     | GSK3B:NM_002093:c.930T>A_p.H310Q             | 0.75 | 752   | 5 | 0 | germline         | germline          | somatic                       |
| 6/30%                      | HCC-1937     | BRCA1:NM_007294:c.5263_5264insC_p.Q1756fs*74 | 0.69 | 668   | 4 | 0 | germline         | germline          | somatic                       |
| 6/30%                      | HCC-1937     | TP53:NM_000546:c.916C>T_p.R306*              | 0.5  | 916   | 4 | 0 | somatic          | somatic           | germline                      |
| 7/30%                      | HCC-1954     | TET2:NM_001127208:c.1381C>T_p.Q461*          | 0.41 | 454   | 3 | 1 | germline         | germline          | somatic                       |
| 7/30%                      | HCC-1954     | SETD2:NM_014159:c.6686T>G_p.V2229G           | 0.46 | 747   | 3 | 1 | germline         | germline          | somatic                       |
| 8/30%                      | NCI-H1395    | FANCA:NM_000135:c.2T>C_p.M1T                 | 0.39 | 99    | 3 | 1 | germline         | germline          | somatic                       |
| 9/40%                      | HCC-1937     | RUNX1:NM_001754:c.1106C>T_p.S369L            | 0.75 | 728   | 3 | 0 | germline         | germline          | somatic                       |

|        |           |                                         |      |      |   |   |          |          |          |
|--------|-----------|-----------------------------------------|------|------|---|---|----------|----------|----------|
| 9/40%  | HCC-1937  | DIS3:NM_001128226:c.80A>G_p.D27G        | 0.81 | 497  | 6 | 0 | germline | germline | somatic  |
| 9/40%  | HCC-1937  | MLL2:NM_003482:c.1952C>T_p.S651L        | 0.75 | 877  | 3 | 0 | germline | germline | somatic  |
| 9/40%  | HCC-1937  | ARID2:NM_152641:c.3217C>T_p.P1073S      | 0.64 | 1044 | 4 | 1 | germline | germline | somatic  |
| 9/40%  | HCC-1937  | GSK3B:NM_002093:c.930T>A_p.H310Q        | 0.8  | 835  | 5 | 0 | germline | germline | somatic  |
| 10/40% | HCC-1954  | FANCA:NM_000135:c.4036G>A_p.A1346T      | 0.46 | 617  | 4 | 2 | germline | germline | somatic  |
| 10/40% | HCC-1954  | EPHA3:NM_005233:c.872C>A_p.P291Q        | 0.44 | 372  | 3 | 1 | germline | germline | somatic  |
| 10/40% | HCC-1954  | EPHB1:NM_004441:c.2942C>T_p.T981M       | 0.44 | 551  | 3 | 1 | germline | germline | somatic  |
| 11/40% | NCI-H1395 | PBRM1:NM_018313:c.4535C>T_p.A1512V      | 0.29 | 319  | 2 | 0 | germline | germline | somatic  |
| 11/40% | NCI-H1395 | CREBBP:NM_004380:c.5933A>G_p.N1978S     | 0.31 | 423  | 4 | 1 | germline | germline | somatic  |
| 11/40% | NCI-H1395 | DOT1L:NM_032482:c.3155G>T_p.G1052V      | 0.49 | 394  | 3 | 0 | somatic  | somatic  | germline |
| 11/40% | NCI-H1395 | BRAF:NM_004333:c.1406G>C_p.G469A        | 0.45 | 327  | 3 | 0 | somatic  | somatic  | germline |
| 12/50% | HCC-1937  | RUNX1:NM_001754:c.1106C>T_p.S369L       | 0.78 | 457  | 3 | 0 | germline | germline | somatic  |
| 12/50% | HCC-1937  | DIS3:NM_001128226:c.80A>G_p.D27G        | 0.89 | 311  | 7 | 0 | germline | germline | somatic  |
| 12/50% | HCC-1937  | MLL2:NM_003482:c.1952C>T_p.S651L        | 0.8  | 752  | 3 | 0 | germline | germline | somatic  |
| 12/50% | HCC-1937  | GSK3B:NM_002093:c.930T>A_p.H310Q        | 0.86 | 589  | 5 | 0 | germline | germline | somatic  |
| 13/50% | HCC-1954  | FANCA:NM_000135:c.4036G>A_p.A1346T      | 0.44 | 787  | 6 | 3 | germline | germline | somatic  |
| 13/50% | HCC-1954  | EPHB1:NM_004441:c.2942C>T_p.T981M       | 0.39 | 754  | 4 | 1 | germline | germline | somatic  |
| 13/50% | HCC-1954  | SETD2:NM_014159:c.6686T>G_p.V2229G      | 0.42 | 963  | 4 | 1 | germline | germline | somatic  |
| 14/50% | NCI-H1395 | PBRM1:NM_018313:c.4535C>T_p.A1512V      | 0.24 | 551  | 2 | 0 | germline | germline | somatic  |
| 14/50% | NCI-H1395 | CREBBP:NM_004380:c.5933A>G_p.N1978S     | 0.32 | 798  | 4 | 1 | germline | germline | somatic  |
| 14/50% | NCI-H1395 | STK11:NM_000455:c.169_169delG_p.E57fs*7 | 0.51 | 941  | 3 | 0 | somatic  | somatic  | germline |
| 14/50% | NCI-H1395 | ATM:NM_000051:c.7996A>G_p.T2666A        | 0.48 | 399  | 2 | 0 | somatic  | somatic  | germline |
| 14/50% | NCI-H1395 | BRAF:NM_004333:c.1406G>C_p.G469A        | 0.52 | 484  | 3 | 0 | somatic  | somatic  | germline |
| 15/75% | HCC-1937  | RUNX1:NM_001754:c.1106C>T_p.S369L       | 0.89 | 523  | 3 | 0 | germline | germline | somatic  |
| 15/75% | HCC-1937  | MLL2:NM_003482:c.1952C>T_p.S651L        | 0.9  | 837  | 3 | 0 | germline | germline | somatic  |
| 15/75% | HCC-1937  | GSK3B:NM_002093:c.930T>A_p.H310Q        | 0.95 | 661  | 5 | 0 | germline | germline | somatic  |
| 16/75% | HCC-1954  | EPHB1:NM_004441:c.2942C>T_p.T981M       | 0.38 | 503  | 4 | 1 | germline | germline | somatic  |
| 16/75% | HCC-1954  | SETD2:NM_014159:c.6686T>G_p.V2229G      | 0.35 | 676  | 4 | 1 | germline | germline | somatic  |
| 17/75% | NCI-H1395 | PBRM1:NM_018313:c.4535C>T_p.A1512V      | 0.15 | 496  | 2 | 0 | germline | germline | somatic  |
| 17/75% | NCI-H1395 | FANCA:NM_000135:c.2T>C_p.M1T            | 0.37 | 222  | 3 | 1 | germline | germline | somatic  |
| 17/75% | NCI-H1395 | CREBBP:NM_004380:c.5933A>G_p.N1978S     | 0.27 | 700  | 4 | 1 | germline | germline | somatic  |

AF: observed allele frequency

depth: local median depth

C: local copy number

M: local copy number of the minor allele
